# Supplementary material
Source: PubMed Central journal article supplement (PMC6800032)
Supplement: NIHMS1053900-supplement-1.pdf [file NIHMS1053900-supplement-1.pdf]

## ASSOCIATED CONTENT

### Supporting Information

#### Experimental Procedures.

**Materials.** Rabbit polyclonal anti-FRS2 $\alpha$  (H-91) and anti-flotillin (H-104) antibodies were from Santa Cruz Biotechnology. Mouse monoclonal anti-DDK antibody (TA50011) was from Origene. Fluorescently labeled secondary antibodies for Infrared Imaging System were from LI-COR. Reagents for electrophoresis and immunoblotting were from Bio-Rad. [9,10-<sup>3</sup>H]palmitic acid was from PerkinElmer Life Sciences. Phosphatase inhibitors cocktail (PhosSTOP) was from Roche. Thiopropyl Sepharose and other reagents for analysis of palmitoylation were from Sigma-Aldrich. Transfection reagents were from Invitrogen (Lipofectamine 2000) and from Mirus Bio (TransitIT-LT1). Subcellular fractionation markers were prepared as described: mCherry-KDEL<sup>1</sup> (ER marker Lys-Asp-Glu-Leu) and mCherry-K-Ras tail<sup>2</sup> (PM marker), mCherry P4M<sup>3</sup> (Golgi marker; gift of Dr. Tamas Balla, NIH). Tissue culture reagents were from Sigma (for biochemical experiments) and HyClone (for microscopy). Primers were from Invitrogen. Cloning reagents were from Thermo Scientific.

**Bioinformatic analyses of FRS2 $\alpha$  lipidation sites.** Palmitoylation sites were predicted using the CSS-PALM 4.0 program<sup>4</sup> (<http://csspalm.biocuckoo.org>). The effect of mutating palmitoylated cysteines on FRS2 $\alpha$  myristoylation was predicted using the ExpASY Myristoylator tool<sup>5</sup> (<https://web.expasy.org/myristoylator/>) and GPS-Lipid<sup>6</sup> (<http://lipid.biocuckoo.org>).

**Generation of mutant and fluorescently-tagged constructs.** Human FRS2 $\alpha$  cDNA (Myc-DDK-tagged, variant 1, NM-006654) was from Origene. This construct was used for transfections in all biochemical experiments. Site-directed mutagenesis was performed to generate point mutants of FRS2 $\alpha$  using the FRS2-myc-DDK construct as a template. These constructs were then used as templates for generating fluorescently tagged FRS2 $\alpha$  by subcloning into pEGFP-N1 vector (Contech).

**Cells.** HEK293, HeLa, and U2OS cells were purchased from American Type Culture Collection. They were cultured in DMEM or, for two-photon experiments, in minimum essential medium (MEM) supplemented with 10% fetal bovine serum (HyClone) and antibiotics. For biochemical experiments the cells were transfected with Lipofectamine 2000 according to the manufacturer's instructions and were used 20-24 h after transfection.

**Analysis of palmitoylation.** Palmitoylation was detected using Acyl-Resin Assisted Capture (Acyl-RAC) method<sup>7</sup>, described in detail in Barylko et al.<sup>8</sup>. Cells were solubilized with 2.5% SDS in 100 mM N-(2-hydroxyethyl)-piperazine-N'-2-ethanesulfonic acid (HEPES) (pH 7.5), 1 mM ethylene diamine tetraacetic acid (EDTA), 0.2 mM phenylmethylsulfonyl fluoride (PMSF), 50 mM dithiothreitol (DTT), and a protease inhibitor cocktail (consisting of 10  $\mu$ g/ml each of N-p-tosyl-L-lysine chloromethyl ester, N-p-tosyl-L-arginine methyl ester, N-p-tosyl-L-lysine chloromethyl ketone, leupeptin, and pepstatin). They were then incubated at 40<sup>o</sup>C for 0.5 h (to reduce potential S-S bonds), then for additional 4 h with methyl methanethiosulfonate (MMTS) to block free thiols. Proteins were then precipitated with cold acetone, and the pellet was extensively washed with 70% acetone to remove excess MMTS. Dried pellets were re-solubilized in 1% SDS

and mixed with thiopropyl-Sepharose resin. Half of the sample was incubated with hydroxylamine (NH<sub>2</sub>OH) to cleave thioester bonds, the other half was incubated with 2 M NaCl as negative control, for 3 h at room temperature. Proteins with free thiols (i.e., from cysteines that were originally palmitoylated before NH<sub>2</sub>OH treatment) are captured on the resin. NaCl treatment was control against false positives. After extensive washing, proteins released from the resin were analyzed by SDS-PAGE and identified by immunoblotting.

To detect palmitoylation directly, HeLa cells expressing FRS2 $\alpha$ -myc-DDK were radiolabeled with [<sup>3</sup>H]palmitate (2.5 mCi/ml) for 4 h, washed with cold PBS, then lysed with buffer containing 50 mM Tris, pH 8.0, 150 mM NaCl, 1% Nonidet P-40, 0.05% SDS, 0.5% deoxycholate, and protease and phosphatase inhibitors for 15 min on ice. Lysates were centrifuged for 15 min at 20,000 x g, and FRS2 $\alpha$  was immunoprecipitated with anti-DDK antibodies. The immunoprecipitates were subjected to SDS-PAGE, stained with Coomassie blue and [<sup>3</sup>H] incorporation was detected by autoradiography.

**Preparation of lipid rafts.** HEK293 cells transfected with FRS2 $\alpha$ <sup>WT</sup> were treated with 1 mM 2-bromopalmitate (2-BP) or vehicle for 6 h. Cells were then resuspended in a solution containing 0.1 M MES buffer pH 6.5, 150 mM NaCl, 1 mM EDTA, phosphatase and protease inhibitor cocktails, and solubilized in 0.5% Triton X-100. The lysates were adjusted to 42% sucrose and overlaid with 35% and then 5% sucrose, prepared in the above solution but without detergent. Samples were centrifuged for 18 h at 210,000 x g in an SW41 rotor. Fractions (1 ml) were collected from the bottom of the tubes. Equal volumes of each fraction were analyzed for the presence of FRS2 $\alpha$  by immunoblotting with anti-DDK antibodies and for endogenous flotillin (raft marker) using anti-flotillin antibodies.

**Cell fractionation.** Transfected cells were washed with PBS and scraped from plates in a solution containing 20 mM Hepes, pH 7.5, 150 mM NaCl, 10 mM EDTA, 5 mM EGTA, 0.2 mM PMSF, and protease and phosphatase inhibitor cocktails. They were lysed by 5 min sonication at medium setting in cell disruptor then centrifuged at 1000 x g for 10 min to obtain post-nuclear supernatant (PNS). PNS was divided into 4 aliquots: No treatment (1) or resuspended in solution supplemented with 1 M NaCl (2), 0.2 M Na<sub>2</sub>CO<sub>3</sub>, pH 11 (3), or 1% Triton X-100 (4). The samples were centrifuged at 210,000 x g for 15 min. Supernatants and pellets (resuspended in the initial sample volume) were used for immunoblotting.

**Live-cell confocal imaging.** To assess the subcellular distribution of WT and mutant forms of FRS2 $\alpha$  (Figure 2C), HeLa cells transfected with WT and mutant forms of FRS2 $\alpha$  with C-terminal EGFP tags were grown on coverslips and visualized with a Zeiss LSM 510 laser scanning confocal microscope. To identify organelles containing WT and mutant FRS2 $\alpha$  (Figure 3), cells were plated on 8-well Lab-Tek chambered cover glass (Nunc) at a low density the day before transfection. 100ng plasmids were transfected into HeLa cells using TransitIT-LT1 (Mirus Bio). Approximately 12-14 h after transfection, cells were imaged at room temperature with a 60 $\times$  objective on a spinning-disc confocal system built around a Ti-E Perfect Focus microscope (Nikon) with an EM camera (c9100-13; Hamamatsu) controlled by Micro-Manager software<sup>9</sup>.

**Two-photon fluorescence correlation spectroscopy (FCS) and Z-scan microscopy.** U2OS cells were subcultured into 8-well coverglass chambered slides (Nunc, Rochester, NY) and transiently transfected using GenJet (SignaGen Laboratories, Rockville, MD) 12-24 h prior to measurement

according to the manufacturer's instructions. Immediately prior to measurements, growth medium was replaced with Dulbecco's phosphate-buffered saline containing calcium and magnesium (Biowhittaker, Walkerville, MD).

FCS experiments were conducted using a 63x C-Apochromat water immersion objective with numerical aperture (NA) = 1.2 (Zeiss, Oberkochen, Germany) and the two-photon focus centered in the cytoplasm of a U2OS cell. Data were collected at an excitation wavelength of 1000 nm and power of 0.3-0.4 mW for 60 s with a sampling rate of 20 kHz. The autocorrelation function of the data was calculated and fit using a 2D-Gaussian beam profile to recover the diffusion time and concentration of the EGFP-labeled protein<sup>10</sup>. Fits were performed using a single-species diffusion model for measurements of FRS2 $\alpha^{C4.5S}$ -EGFP and FRS2 $\alpha^{G2A}$ -EGFP, while a two-species diffusion model was required for the measurements of FRS2 $\alpha^{WT}$ -EGFP.

Z-scan measurements on PM binding were carried out as described previously<sup>11</sup>. The objective, excitation wavelength and power were the same as used in the FCS experiments. Photon counts were detected by an avalanche photodiode (APD, SPCM-AQ-141, Perkin-Elmer, Dumberry, Quebec), recorded by a Flex04-12D card (correlator.com, Bridgewater, NJ) with a sampling frequency of 250 Hz, and analyzed with programs written in IDL 8.5 (Research Systems, Boulder, CO). An arbitrary waveform generator (Model No. 33522A, Agilent Technologies, Santa Clara, CA) moved a PZ2000 piezo stage (ASI, Eugene, OR) axially to perform z-scans. The driving signal from the arbitrary waveform generator was a linear ramp function with a peak-to-peak amplitude of 1.6 V and a period of 10 seconds. The peak-to-peak voltage corresponded to 24.1  $\mu\text{m}$  of axial travel at a speed of  $v_z = 4.82 \mu\text{m/s}$ .

Z-scans were analyzed using a modified squared Gaussian-Lorentzian (mGL) point spread function (PSF)<sup>12</sup>. Z-scan calibration was performed as described in order to determine the radial and axial beam-waist ( $\omega_0$  and  $z_0$ ) as well as the axial decay parameter  $y$ , resulting in values of  $\omega_0 = 0.45 \pm 0.05 \mu\text{m}$ ,  $z_0 = 1.1 \pm 0.2 \mu\text{m}$ , and  $y = 2.5 \pm 0.4$ . The z-scan intensity profile ( $F$ ) was fit by the delta-slab-delta model to identify the intensity contributions from the dorsal and ventral plasma membranes ( $F_M$ ), as well as the cytoplasm ( $F_c$ )<sup>11</sup>. These intensity contributions were then converted to plasma membrane intensity fractions<sup>13</sup>,  $f_M$ , by dividing the membrane intensity contribution by the total intensity at the plasma membrane using the equation  $f_M = \frac{F_M(z = z_M)}{F(z = z_M)}$ .

**Other procedures.** Protein concentrations were determined using a modified Lowry method<sup>14,15</sup> with BSA as a standard. SDS-PAGE was carried out according to Laemmli<sup>16</sup>. Proteins were transferred to nitrocellulose, and immunoblotted with the indicated antibodies. Bound primary antibodies were detected and quantified using fluorescently labeled secondary antibody in the LI-COR Odyssey system.

Supplemental Figures

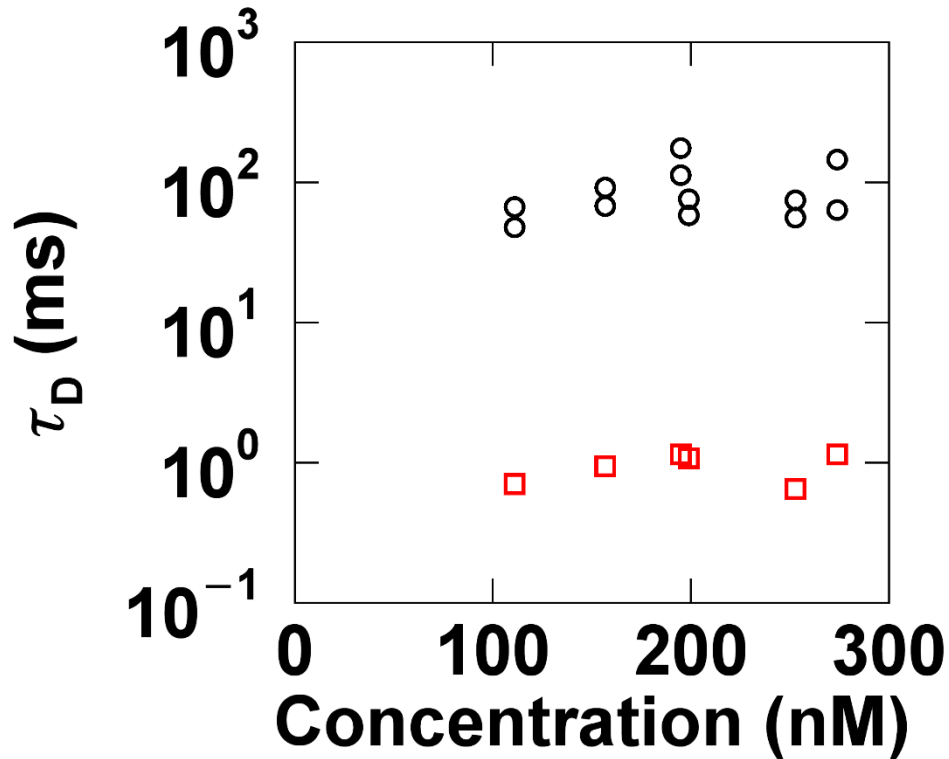

**Figure S1. FCS characterization of the diffusion of FRS2 $\alpha^{\text{WT}}$ -EGFP.** Fits of the autocorrelation function to a two-species model identified the cytoplasmic diffusion time (red squares) and the PM-bound diffusion time (black circles). The cytoplasmic diffusion time is on the order of 1 ms, which is close to the observed diffusion data of the mutants at equivalent concentrations (Fig. 4A). PM binding results in a sharp reduction of mobility as evidence by a diffusion time of ~100 ms.

## REFERENCES for Supporting Information

1. Chang, C.L., Hsieh T.S., Yang, T.T., Rothberg, K.G., Azizoglu, D.B., Volk, E., Liao, J.C., and Liou, J. (2013) Feedback regulation of receptor-induced  $\text{Ca}^{2+}$  signaling mediated by E-Syt1 and Nir2 at endoplasmic reticulum-plasma-membrane junctions. *Cell Rep.* 5, 813-825.
2. Heo, W.D., Inoue, T., Park, W.S., Kim, M.L., Park, B.O., Wandless, T.J., and Meyer, T. (2006) PI(3,4,5)P<sub>3</sub> and PI(4,5)P<sub>2</sub> lipids target proteins with polybasic clusters to the plasma membrane. *Science* 314, 1458–1461.
3. Hammond, G.R., Machner, M.P., and Balla, T. (2014) A novel probe for phosphatidylinositol 4-phosphate reveals multiple pools beyond the Golgi. *J. Cell Biol.* 205, 113-126.
4. Zhou, F., Xue, Y., Yao, X., and Xu, Y. (2006) CSS-Palm: palmitoylation site prediction with a clustering and scoring strategy (CSS). *Bioinformatics* 22, 894– 896.
5. Bologna, G., Yvon, C., Duvaud, S., and Veuthey, A.L. (2004) N-terminal myristoylation predictions by ensembles of neural networks. *Proteomics* 4, 1626-1632.
6. Xie, Y., Zheng, Y., Li, H., Luo, X., He, Z., Cao, S., Shi, Y., Zhao, Q., Xue, Y., Zuo, Z., and Ren, J. (2016) GPS-Lipid: a robust tool for the prediction of multiple lipid modification sites. *Sci. Rep.* 6:28249.
7. Forrester, M.T., Hess, D.T., Thompson, J.W., Hultman, R., Moseley, M.A., Stamler, J.S., and Casey, P.J. (2011) Site-specific analysis of protein S-acylation by resin-assisted capture. *J. Lipid Res.* 52, 393-398.
8. Barylko B, Wilkerson JR, Cavalier SH, Binns DD, James NG, Jameson DM, Huber KM, and Albanesi JP. (2018) Palmitoylation and membrane binding of Arc/Arg3.1: A potential role in synaptic depression. *Biochemistry* 57, 520-524.
9. Edelstein, A., Amodaj, N., Hoover, K., Vale, R., and Stuurman, N. (2010) Computer control of microscopes using  $\mu$ Manager. *Curr. Protoc. Mol. Biol. Chapter 14: Unit14.20.*
10. van Orden, A., Fogarty, K., and Jung, J. (2004) Fluorescence fluctuation spectroscopy: a coming of age story. *Appl. Spectrosc.* 58, 122A-137A.
11. Smith, E.M., Hennen, J., Chen, Y., and Mueller, J.D. (2015) Z-scan fluorescence profile deconvolution of cytosolic and membrane-associated protein populations. *Anal. Biochem.* 480, 11-20.
12. Macdonald, P.J., Chen, Y., Wang, X., Chen, Y., and Mueller, J.D. (2010) Brightness analysis by Z-scan fluorescence fluctuation spectroscopy for the study of protein interactions within living cells. *Biophys. J.* 99, 979-988.

13. Hennen, J., Hur, K.H., Saunders, C.A., Luxton, G.W.G., and Mueller, J.D. (2017) Quantitative brightness analysis of protein oligomerization in the nuclear envelope. *Biophys. J.* *113*, 138-147.
14. Lowry, O.H., Rosebrough, N.J., Farr, A.L., and Randall, R.J. (1951) Protein measurement with the Folin phenol reagent. *J. Biol. Chem.* *193*, 265-275.
15. Peterson, G.L. (1979) Review of the Folin phenol protein quantification method of Lowry, Rosebrough, Farr and Randall. *Anal. Biochem.* *100*, 201-220.
16. Laemmli, U.K. (1970) Cleavage of structural proteins during the assembly of the head of bacteriophage T4. *Nature.* *227*, 680-685.
